EDITORIAL

# *PLOS Computational Biology* 2017 Reviewer and Editorial Board Thank You

PLOS and the *PLOS Computational Biology* team would like to express our appreciation for our associate editors, guest editors, and reviewers who contributed to the peer-review process this past year. We are indebted to our volunteers who generously give their time and expertise to thoroughly review research and advance Open Access. In 2017, *PLOS Computational Biology* received the help of 160 Editorial Board members and 248 guest editors to curate 1,698 submissions. Along with the participation of 2,499 reviewers, we were able to publish 554 articles with meaningful and impactful results.

The names of our 2017 editors that handled submitted manuscripts appear in the Supporting Information as [S1 Editor List](#) and as [S1 Guest Editor List](#). Our reviewers appear in the Supporting Information as [S1 Reviewer List](#). With genuine gratitude, we thank you all for your dedicated support of *PLOS Computational Biology* and our efforts to promote Open Science, thereby contributing to the scientific community as a whole. Thank you all.

## Supporting information

**S1 Editor List.** Alphabetical list of 2017 *PLOS Computational Biology* Editorial Board Members.

(PDF)

**S1 Guest Editor List.** Alphabetical list of 2017 *PLOS Computational Biology* Guest Editors.

(PDF)

**S1 Reviewer List.** Alphabetical list of 2017 *PLOS Computational Biology* peer reviewers (A-D).

(PDF)

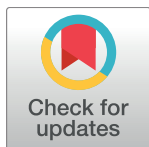

## OPEN ACCESS

**Citation:** (2018) *PLOS Computational Biology* 2017 Reviewer and Editorial Board Thank You. PLoS Comput Biol 14(3): e1006066. <https://doi.org/10.1371/journal.pcbi.1006066>

**Published:** March 15, 2018

**Copyright:** © 2018 The PLOS Computational Biology Staff. This is an open access article distributed under the terms of the [Creative Commons Attribution License](#), which permits unrestricted use, distribution, and reproduction in any medium, provided the original author and source are credited.

**Funding:** The authors received no specific funding for this work.

**Competing interests:** The authors have declared that no competing interests exist.

## References

1. (2017) *PLOS Computational Biology* 2016 Reviewer and Editorial Board Thank You. PLoS Comput Biol 13(3): e1005442. <https://doi.org/10.1371/journal.pcbi.1005442> PMID: 28319135
2. (2016) *PLOS Computational Biology* 2015 Reviewer Thank You. PLoS Comput Biol 12(2):e1004815. <https://doi.org/10.1371/journal.pcbi.1004815>
3. (2015) *PLOS Computational Biology* 2014 Reviewer Thank You. PLoS Comput Biol 11(2):e1004184. <https://doi.org/10.1371/journal.pcbi.1004184>
